# Supplementary material for: Are SGLT2 polymorphisms linked to diabetes mellitus and cardiovascular disease? Prospective study and meta-analysis
Source: PubMed Central journal article supplement (PMC6684948; doi:10.1042/bsr20190299), 2019-08-07
Supplement: bsr20190299_Supp1.pdf [file bsr20190299_Supp1.pdf]

**S1 Fig: Flow chart of the literature selection process in the meta-analysis**

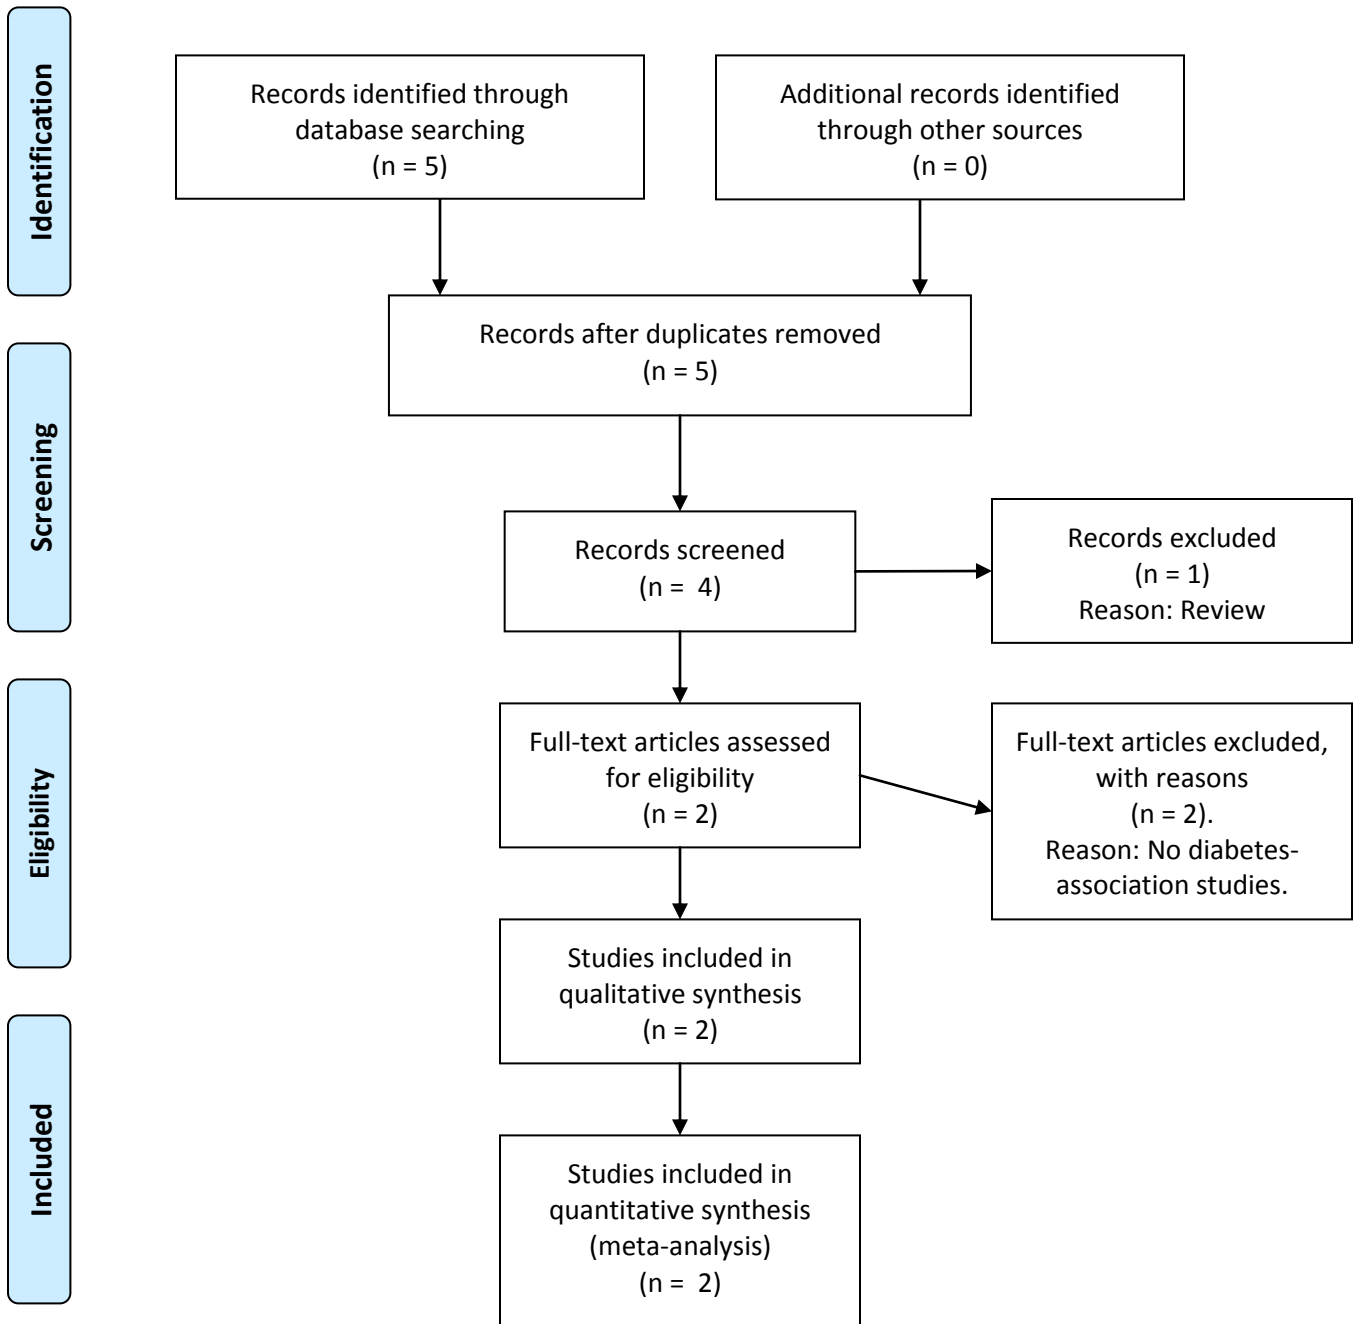

# rs3813008

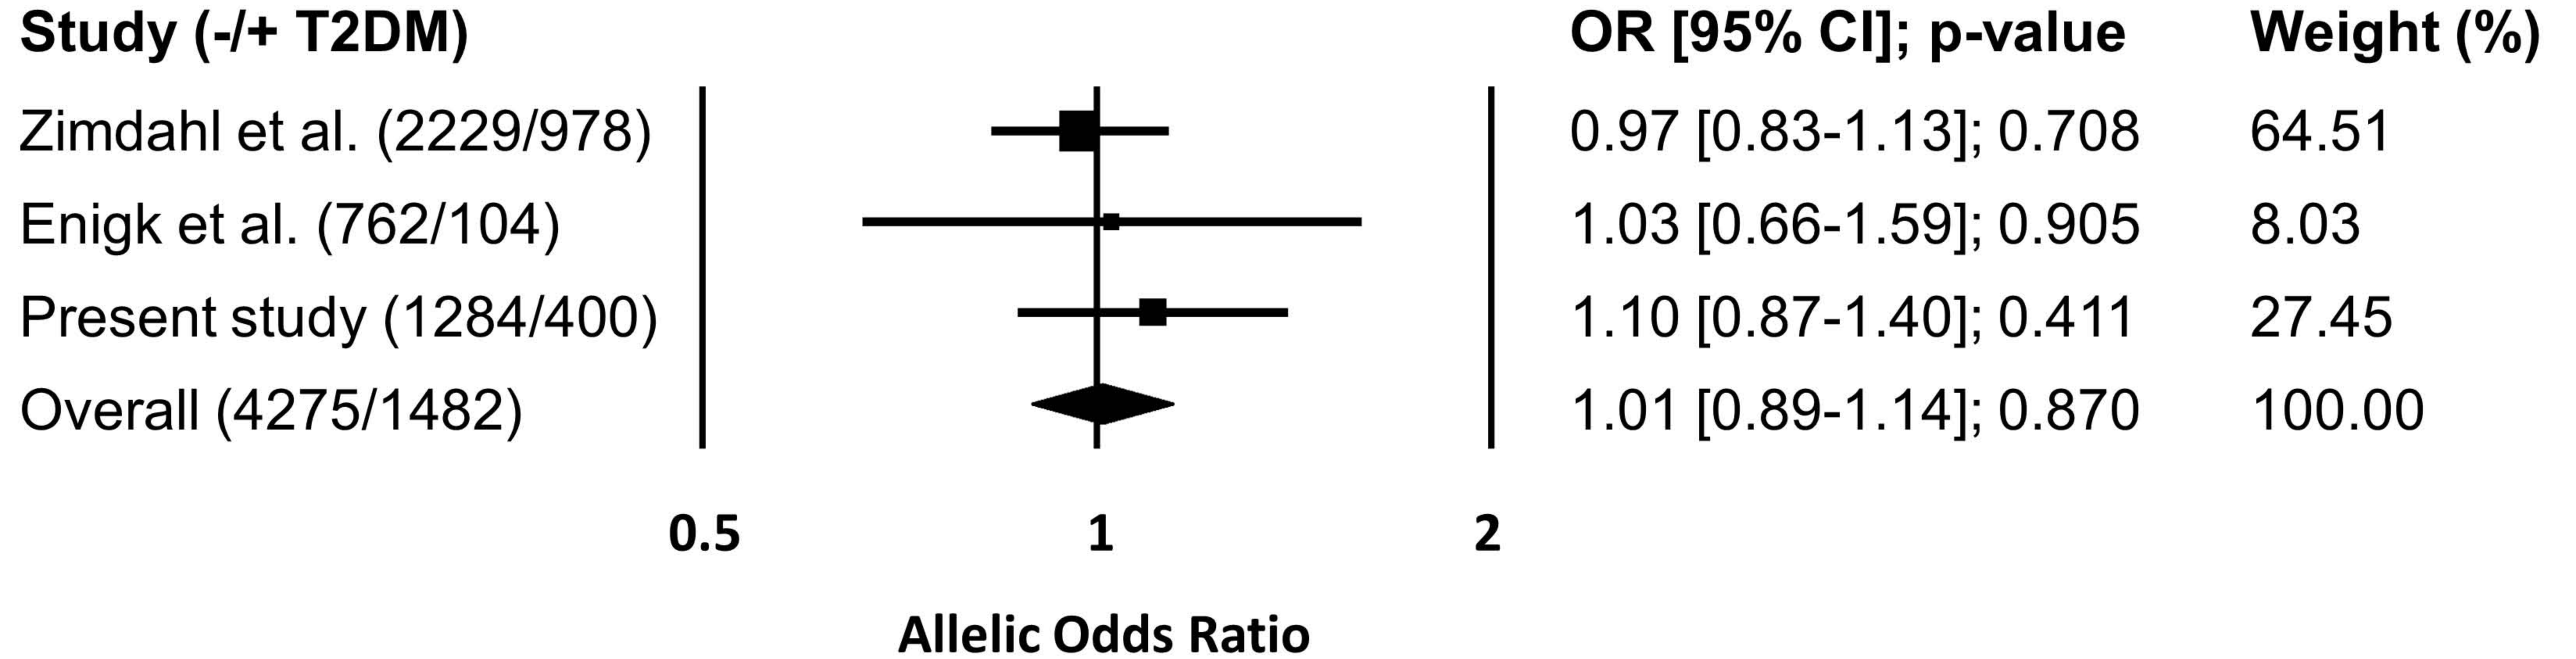

**Note:** Weights are from a fixed model

## rs3116150

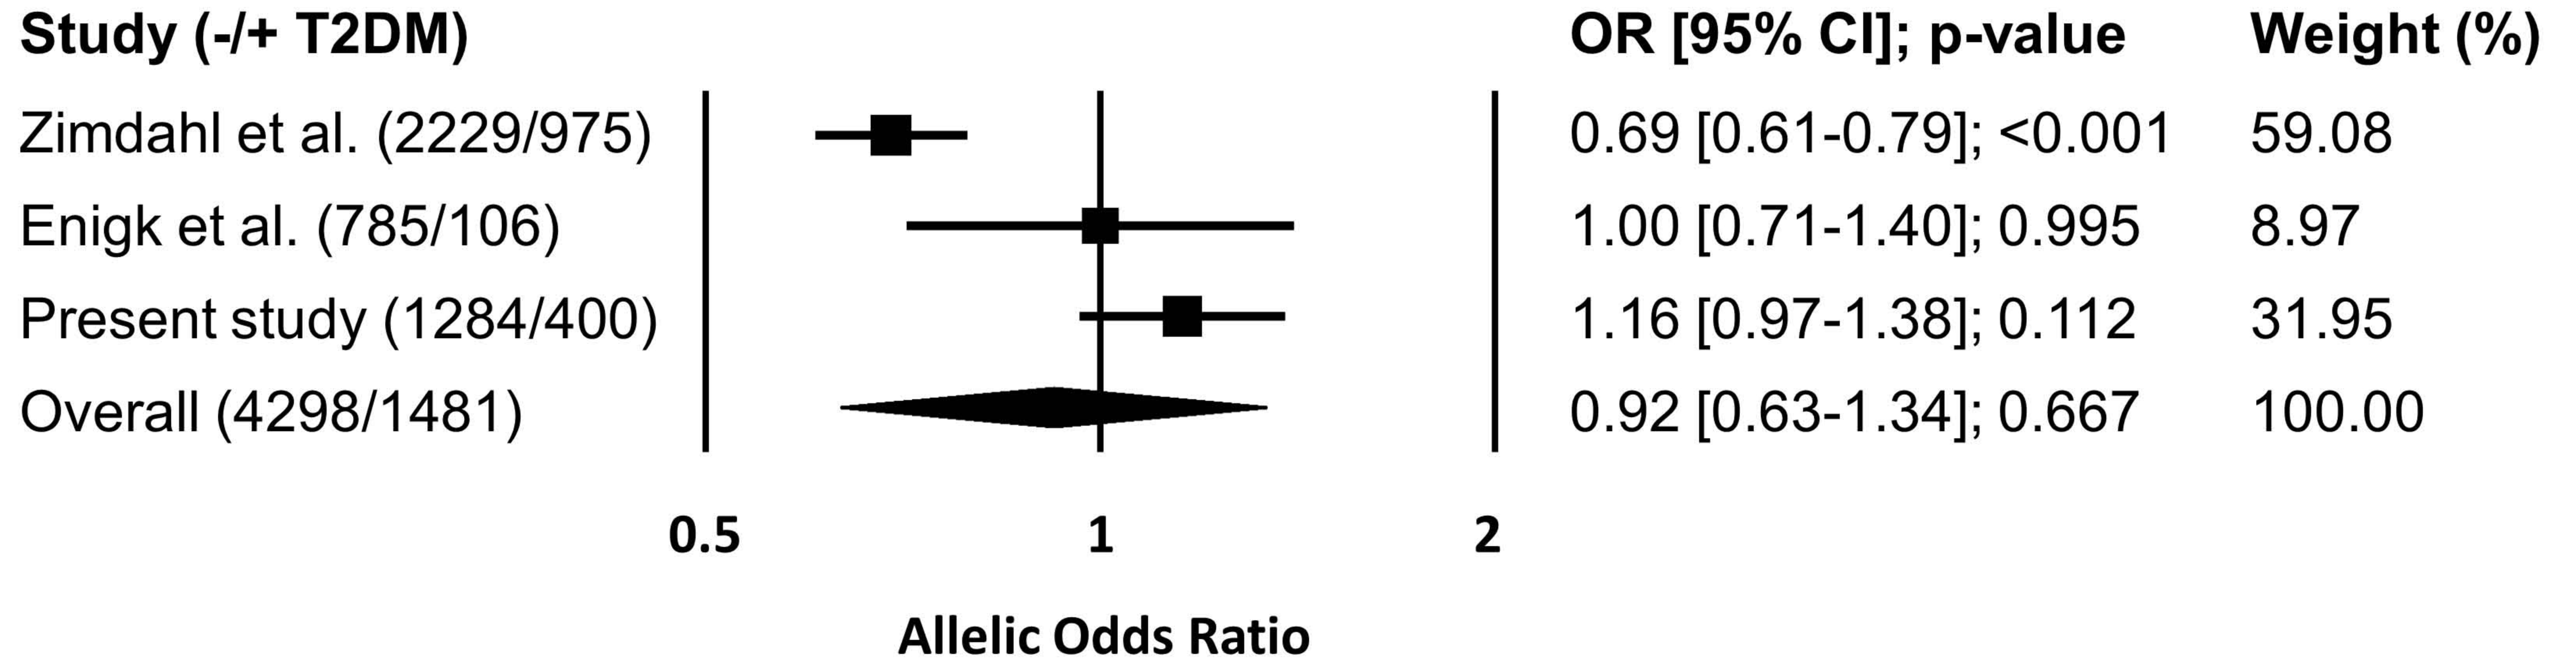

**Note:** Weights are from a random-effect model

**S1 Table: Genotype distributions among studies included in meta-analyses**

| Study          | rs9934336 (controls/cases) |         |        | HWE p-value |
|----------------|----------------------------|---------|--------|-------------|
|                | GG                         | GA      | AA     |             |
| Enigk et al.   | 390/65                     | 305/33  | 56/7   | 1.00        |
| Zimdahl et al. | 1251/572                   | 843/362 | 135/45 | 0.299       |
| Present study  | 699/240                    | 498/140 | 87/20  | 0.920       |
|                |                            |         |        |             |
|                | rs3813008 (controls/cases) |         |        |             |
|                | GG                         | GA      | AA     |             |
| Enigk et al.   | 588/80                     | 162/22  | 12/2   | 0.740       |
| Zimdahl et al. | 1643/727                   | 543/233 | 43/18  | 0.791       |
| Present study  | 972/295                    | 296/99  | 16/6   | 0.155       |
|                |                            |         |        |             |
|                | rs3116150 (controls/cases) |         |        |             |
|                | GG                         | GA      | AA     |             |
| Enigk et al.   | 457/64                     | 286/34  | 42/8   | 0.920       |
| Zimdahl et al. | 1204/625                   | 881/320 | 144/35 | 0.320       |
| Present study  | 730/210                    | 474/160 | 80/30  | 0.823       |

HWE, Hardy-Weinberg equilibrium

**S2 Table: Evaluation of publication bias**

|           | Begg-Mazumdar rank correlation test, p-value | Egger's regression test, p-value | P-value |
|-----------|----------------------------------------------|----------------------------------|---------|
| rs9934336 | 0.117                                        | 0.200                            | es      |
| rs3813008 | 0.602                                        | 0.643                            | wer     |
| rs3116150 | 0.602                                        | 0.615                            | e       |

two-tailed. The Begg and Mazumdar rank correlation test was applied without continuity correction.

**S3 Table: Association between SLC5A2 SNPs and significant coronary atherosclerosis - results from multivariable logistic regression analyses**

| SNP       | Adjustment model | OR [95% CI]      | p-value |
|-----------|------------------|------------------|---------|
| rs9934336 | 1                | 0.98 [0.83-1.15] | 0.773   |
|           | 2                | 0.99 [0.84-1.18] | 0.930   |
| rs3813008 | 1                | 0.92 [0.74-1.14] | 0.448   |
|           | 2                | 0.89 [0.71-1.11] | 0.287   |
| rs3116150 | 1                | 0.99 [0.84-1.17] | 0.908   |
|           | 2                | 0.96 [0.81-1.15] | 0.679   |

Adjustment model 1 adjusts for age, sex, and body mass index; model 2 adjusts for age, sex, body mass index, type 2 diabetes mellitus, hypertension, smoking, LDL cholesterol, and HDL cholesterol. OR, odds ratio; CI, confidence interval.

**S4 Table: Associations between SLC5A2 SNPs and the extend of significant coronary lesions**

| SNP       | Genotype | Mean ( $\pm$ SD) | Number of significant stenoses |     |     |     |    |    |    |    |   |   | p-value |
|-----------|----------|------------------|--------------------------------|-----|-----|-----|----|----|----|----|---|---|---------|
|           |          |                  | 0                              | 1   | 2   | 3   | 4  | 5  | 6  | 7  | 8 | 9 |         |
| rs599839  | GG       | 1.37 $\pm$ 1.57  | 396                            | 176 | 154 | 126 | 47 | 19 | 12 | 7  | 1 | 1 | 0.423   |
|           | GA       | 1.44 $\pm$ 1.69  | 263                            | 127 | 103 | 64  | 45 | 19 | 7  | 5  | 4 | 1 |         |
|           | AA       | 1.23 $\pm$ 1.62  | 50                             | 19  | 19  | 9   | 5  | 2  | 0  | 1  | 0 | 1 |         |
| rs3813008 | GG       | 1.40 $\pm$ 1.61  | 531                            | 232 | 217 | 155 | 71 | 32 | 12 | 10 | 4 | 2 | 0.474   |
|           | GA       | 1.38 $\pm$ 1.66  | 167                            | 86  | 54  | 42  | 26 | 8  | 7  | 3  | 1 | 1 |         |
|           | AA       | 0.91 $\pm$ 1.06  | 11                             | 4   | 5   | 2   | 0  | 0  | 0  | 0  | 0 | 0 |         |
| rs3116150 | GG       | 1.37 $\pm$ 1.62  | 396                            | 187 | 154 | 101 | 57 | 21 | 11 | 7  | 3 | 2 | 0.810   |
|           | GA       | 1.40 $\pm$ 1.60  | 263                            | 117 | 105 | 86  | 34 | 17 | 4  | 5  | 2 | 1 |         |
|           | AA       | 1.39 $\pm$ 1.71  | 50                             | 18  | 17  | 12  | 6  | 2  | 4  | 1  | 0 | 0 |         |

Analyses were performed by Kruskal-Wallis tests under an additive model of inheritance. The extent of significant CAD was defined as the number of significant coronary stenoses (lumen narrowing  $\geq 50\%$ ) in a given patient.



**S5 Table: Association between SLC5A2 SNPs and significant coronary atherosclerosis - results from multivariable Cox regression analyses**

| SNP       | Adjustment model | HR [95% CI]      | p-value |
|-----------|------------------|------------------|---------|
| rs9934336 | 1                | 0.93 [0.81-1.07] | 0.311   |
|           | 2                | 0.94 [0.82-1.09] | 0.438   |
| rs3813008 | 1                | 0.95 [0.79-1.14] | 0.585   |
|           | 2                | 0.93 [0.77-1.12] | 0.430   |
| rs3116150 | 1                | 1.05 [0.92-1.21] | 0.476   |
|           | 2                | 1.06 [0.92-1.22] | 0.416   |

Adjustment model 1 adjusts for age, sex, and body mass index; model 2 adjusts for age, sex, body mass index, type 2 diabetes mellitus, hypertension, smoking, LDL cholesterol, and HDL cholesterol. HR, hazard ratio; CI, confidence interval.

**S6 Table: Association of SLC5A2 variants with significant coronary artery disease in non-diabetic patients and patients with type 2 diabetes**

| SNP       | T2DM | Genotype frequencies (controls/cases) |         |       | OR [95% CI]      | p-value | p <sub>interaction</sub> -value |
|-----------|------|---------------------------------------|---------|-------|------------------|---------|---------------------------------|
|           |      | AA                                    | AB      | BB    |                  |         |                                 |
| rs9934336 | No   | 318/381                               | 217/281 | 44/43 | 0.98 [0.82-1.18] | 0.859   | 0.943                           |
|           | Yes  | 78/162                                | 47/93   | 6/14  | 1.00 [0.70-1.42] | 0.993   |                                 |
| rs3813008 | No   | 435/537                               | 136/160 | 8/8   | 0.94 [0.74-1.19] | 0.859   | 0.912                           |
|           | Yes  | 97/198                                | 31/68   | 3/3   | 0.97 [0.63-1.49] | 0.886   |                                 |
| rs3116150 | No   | 332/398                               | 211/263 | 36/44 | 1.03 [0.86-1.23] | 0.791   | 0.193                           |
|           | Yes  | 65/145                                | 52/108  | 14/16 | 0.80 [0.58-1.11] | 0.180   |                                 |

Associations between analysed SLC5A2 variants and significant coronary stenosis were determined by logistic regression analysis under an additive model of inheritance. SNP, single nucleotide polymorphism; A, major allele, B, minor allele; OR, odds ratio, CI, confidence interval.

**S7 Table: Association of SLC5A2 variants with future cardiovascular events in non-diabetic patients and patients with type 2 diabetes**

| SNP       | T2DM | Genotype frequencies (controls/cases) |         |       | HR [95% CI]      | p-value | p <sub>interaction</sub> -value |
|-----------|------|---------------------------------------|---------|-------|------------------|---------|---------------------------------|
|           |      | AA                                    | AB      | BB    |                  |         |                                 |
| rs9934336 | No   | 483/205                               | 352/141 | 62/24 | 0.96 [0.81-1.13] | 0.581   | 0.942                           |
|           | Yes  | 141/95                                | 90/48   | 11/9  | 0.97 [0.73-1.28] | 0.809   |                                 |
| rs3813008 | No   | 681/276                               | 206/88  | 10/6  | 1.04 [0.84-1.29] | 0.689   | 0.139                           |
|           | Yes  | 174/118                               | 63/33   | 5/1   | 0.75 [0.53-1.07] | 0.117   |                                 |
| rs3116150 | No   | 508/212                               | 338/130 | 51/28 | 1.02 [0.87-1.21] | 0.807   | 0.661                           |
|           | Yes  | 129/76                                | 94/65   | 19/11 | 1.09 [0.85-1.40] | 0.479   |                                 |

Associations between analysed SLC5A2 variants and significant coronary stenosis were determined by Cox regression analysis under an additive model of inheritance. SNP, single nucleotide polymorphism; A, major allele, B, minor allele; HR, hazard ratio, CI, confidence interval.
